- the response to sympathetic stimulation, *Brit. J. Pharmacol.* 22: 527, 1964.
19. Black, J. W., Crowther, A. F., Shanks, R. G., Smith, L. H., and Dornhorst, A. C.: A new adrenergic  $\beta$ -receptor antagonist, *Lancet* 1: 1080, 1964.
  20. Donald, D. E., Kvale, J., and Shepherd, J. T.: The effect of an adrenergic  $\beta$ -receptor antagonist on the cardiovascular system of the dog, *J. Pharmacol. Exp. Ther.* 143: 344, 1964.
  21. Somani, P., and Lum, B. K.: The antiarrhythmic actions of beta adrenergic blocking agents, *J. Pharmacol. Exp. Ther.* 147: 194, 1965.
  22. Atmacaković, D., and Alper, M. H.: Beta-blocking actions of propranolol in the isolated mammalian heart, *Fed. Proc.* 24: 717, 1965.
  23. Black, J. W., Duncan, W. A. M., and Shanks, R. G.: Comparison of some properties of promethalin and propranolol, *Brit. J. Pharmacol.* 25: 577, 1965.
  24. Stanton, H. C., Kirelgessner, T., and Parmenter, K.: Cardiovascular pharmacology of two new  $\beta$ -adrenergic receptor antagonists, *J. Pharmacol. Exp. Ther.* 149: 174, 1965.
  25. Kvam, D. C., Riggilo, D. A., and Lish, P. M.: Effect of some new  $\beta$ -adrenergic blocking agents on certain metabolic responses to catecholamines, *J. Pharmacol. Exp. Ther.* 149: 183, 1965.
  26. Levy, J. V., and Richards, V.: Inotropic and metabolic effects of three  $\beta$ -adrenergic receptor blocking drugs on isolated rabbit left atria, *J. Pharmacol. Exp. Ther.* 150: 361, 1965.
  27. Dudel, J., and Trautwein, I.: Die Wirkung von Adrenalin auf das Ruhepotential von Myokardfasern des Vorhofs, *Experientia* 12: 396, 1956.
  28. Burnstock, G.: The action of adrenaline on excitability and membrane potential in the taenia coli of the guinea-pig and the effect of DNP on this action and on the action of acetylcholine, *J. Physiol.* 143: 183, 1958.
  29. Burnstock, G., Campbell, G., Bennett, M., and Holman, M. E.: Inhibition of the smooth muscle of the taenia coli, *Nature* 200: 181, 1963.
  30. Jenkinson, D. H., and Morton, I. K. M.: Effects of noradrenaline and isoprenaline on the permeability of depolarized intestinal smooth muscle to inorganic ions, *Nature* 205: 505, 1965.
  31. Lundholm, L., Mohme-Lundholm, E., and Svedmyr, N.: Introductory remarks, second symposium on catecholamines, *Pharmacol. Rev.* 18: 255, 1966.
  32. Ellis, S., and Beckett, S. B.: Mechanism of the potassium mobilizing action of epinephrine and glucagon, *J. Pharmacol. Exp. Ther.* 142: 318, 1963.
  33. Ussing, H. H.: The active ion transport through the isolated frog skin in the light of tracer studies, *Acta Physiol. Scand.* 17: 1, 1949.
  34. Ussing, H. H.: The alkali metal ions in isolated system and tissue, *In: The Alkali Metal Ions in Biology*, Berlin, Springer Verlag, 1960, p. 127.
  35. Anton, A. H., Gravenstein, J. S., and Wheat, M. W., Jr.: Extracorporeal circulation and endogenous epinephrine and norepinephrine in plasma, atrium and urine in man. A comparison of ether and halothane anesthesia, *ANESTHESIOLOGY* 25: 262, 1964.
  36. Brewster, W. R., Jr., Isaacs, J. P., and Andersen, T. W.: Depressant effect of ether on myocardium of the dog and its modification by reflex release of epinephrine and norepinephrine, *Amer. J. Physiol.* 175: 399, 1953.
  37. Bagwell, E. E., Woods, E. F., and Linker, R. P.: Influence of reserpine on cardiovascular and sympatho-adrenal responses to ether anesthesia in the dog, *ANESTHESIOLOGY* 25: 15, 1964.

---

## Drugs

**OPIATE ANTAGONISTS** Five cases of overdosage of levallorphan are reported when the dosage usually used for nalorphine was mistakenly ordered for levallorphan. Respiratory paralysis followed; in three patients, artificial respiration was used, whereas in two patients opiates were used successfully to antagonize the depressant effect of the levallorphan. (Harder, H. J., and Leutner, V.: *Morphine-Antagonists. Quantum et quado? Overdosage—a Contribution to Well-Dosed and Directed Therapy with Antidotes, Der Anaesthetist* 15: 279 (Aug.) 1966.)
